# Supplementary material for: Temperature dependent fabrication of various rod and rhombohedral-shaped mesoporous Co3O4 crystals and their capability towards elimination of toxic Cr(vi) ions from the aquatic environment
Source: Royal Society of Chemistry journal article supplement (doi:10.1039/d3nj00598d), 2023-01-01
Supplement: d3nj00598d1.pdf [file d3nj00598d1.pdf]

## Supplementary Information

### Temperature dependent fabrication of various rod and rhombohedral shaped mesoporous $\text{Co}_3\text{O}_4$ crystals and their capability towards elimination of toxic Cr(VI) ion from the aquatic environment

Utsav Sengupta<sup>1</sup>, Ankita Mukherjee<sup>2</sup>, Muthaimanoj Periyasamy<sup>2</sup>, Sudipta Mukhopadhyay<sup>2</sup>, KellieJ. Jenkinson<sup>3</sup>, Andrew E.H. Wheatley<sup>3</sup> and Arik Kar<sup>1\*</sup>

<sup>1</sup>Department of Chemistry, Indian Institute of Engineering Science and Technology, Shibpur, Howrah 711 103, Kolkata, India

<sup>2</sup>Department of Mining Engineering, Indian Institute of Engineering Science and Technology, Shibpur, Howrah 711 103, Kolkata, India

<sup>3</sup>Department of Chemistry, University of Cambridge, Lensfield Road, Cambridge CB2 1EW, United Kingdom

#### \*Corresponding Author

Phone no. : +0091 7044752398

Email Address: akar@chem.iiests.ac.in

The supporting file contains eleven figures with respective captions only.

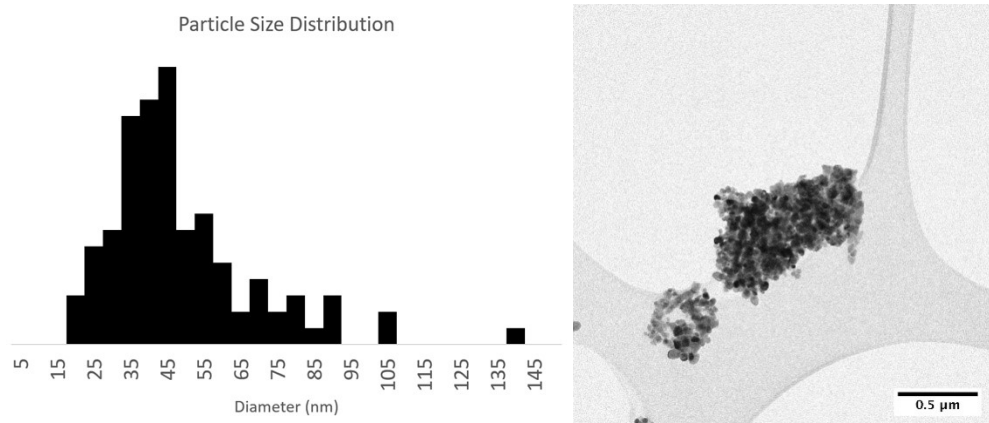

**Figure S1.** (a) 400 °C heated  $\text{Co}_3\text{O}_4$  nanoparticlessize distribution curve. (b) TEM image (0.5  $\mu\text{m}$  scale) of the considered particles (N = 100) which are taken to calculate the distribution.

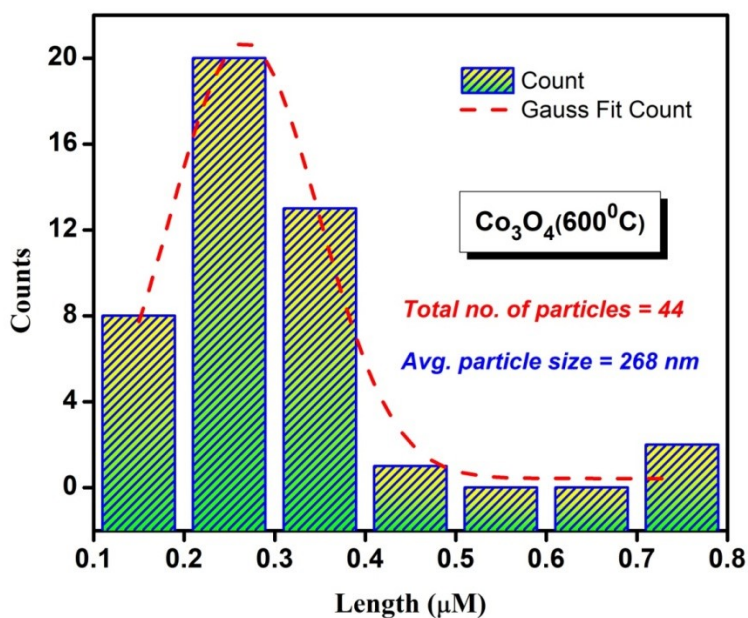

**Figure S2.** Particle size distribution (with Gaussian fitting) of 600 °C heated  $\text{Co}_3\text{O}_4$  sample (N = 44).

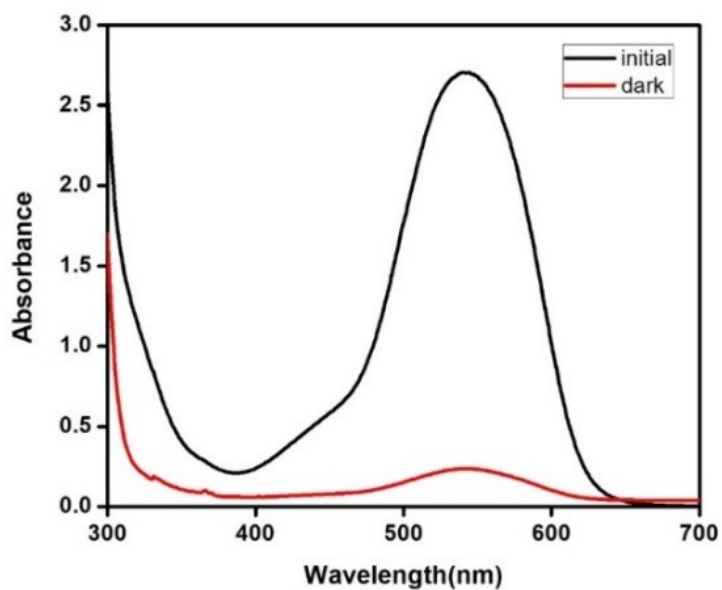

**Figure S3.** Dark test for Cr(VI)reduction process (Absorbance plot comparison of before and after reaction without any light source).

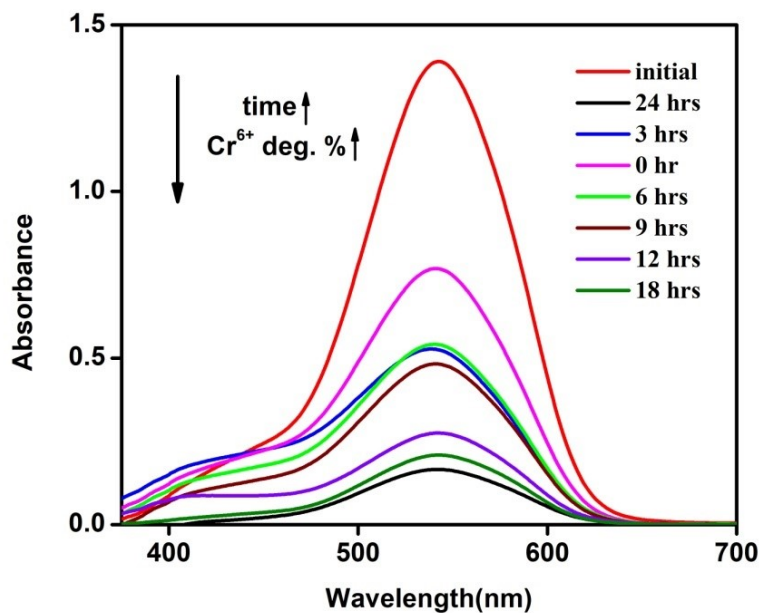

**Figure S4.** Time dependent absorbance curves of First Order kinetics model in the Cr(VI) removal kinetics study.

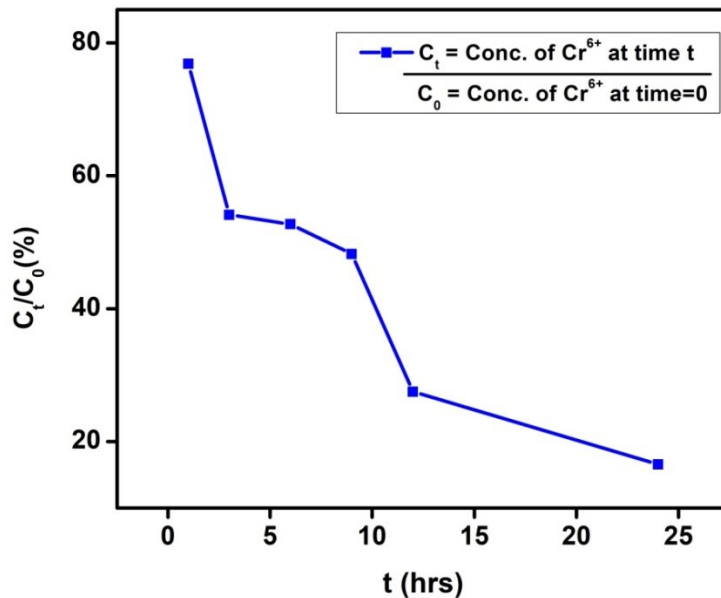

**Figure S5.** Concentration ratio (in %) vs time plot in FOM model in the Cr(VI)removal kinetics study.

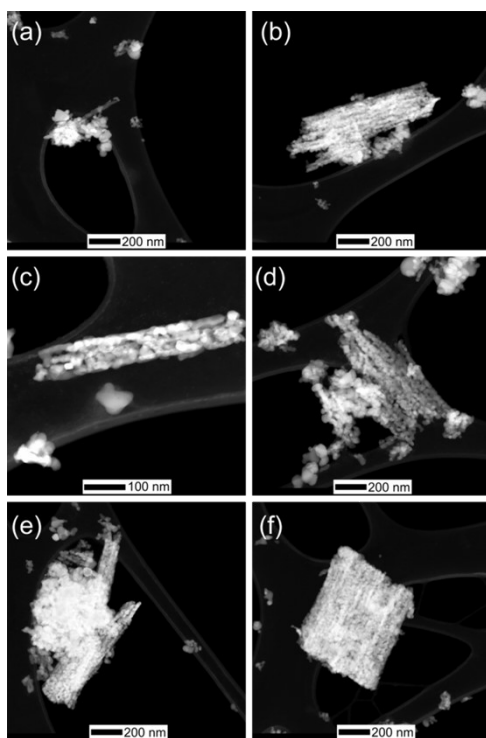

**Figure S6.** (a-f) Representative STEM-HAADF imaging of  $\text{Co}_3\text{O}_4$  particles heated to  $400\text{ }^\circ\text{C}$  after 3 cycles of Cr(VI) sequestering tests. Data show self-assembled aggregates of various sizes

and fragments, suggesting the partial retention of motifs seen in the unused sample. Scale bars are set upto 200 nm (a, b, d, e and f) and 100 nm (c) respectively.

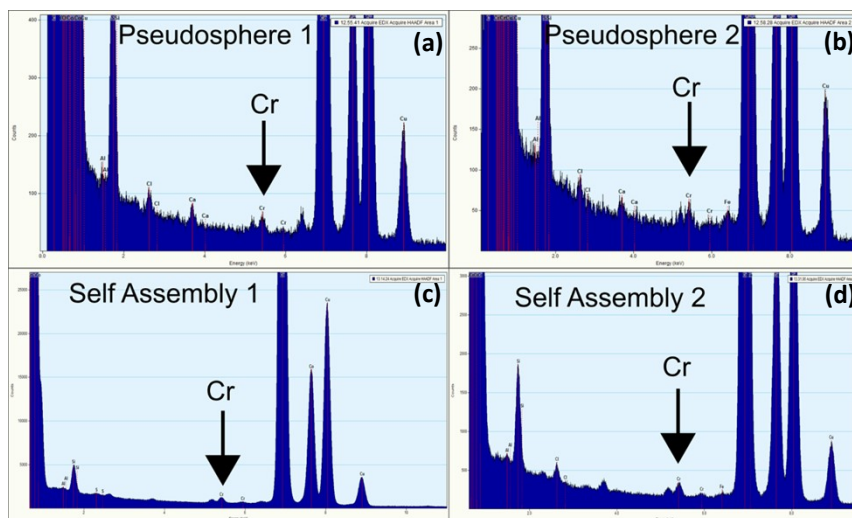

**Figure S7.** (a-d) STEM-EDS analysis of representative pseudo spheres and agglomerates of  $\text{Co}_3\text{O}_4$  heated to 400 °C after 3 cycles of Cr(VI) sequestering tests. The artifact at 5.1 eV is attributable to the detector.

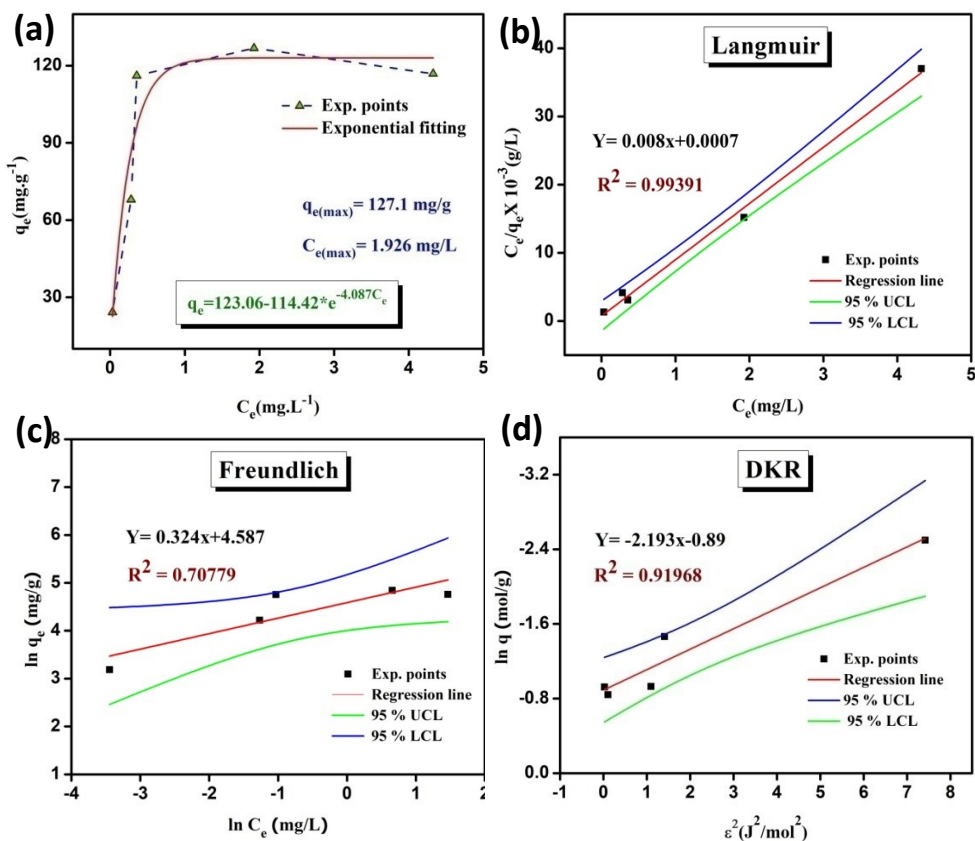

**Figure S8.** (a) Concentration effect on the Cr(VI) adsorption at the equilibrium with the non-linear curve fitting, (b) Langmuir, (c) Freundlich and (d) Dubinin-Kaganer-Radushkevich isotherm models fitted with the experimental data. The adsorption process was performed using  $Co_3O_4$  (400 °C) sorbent with constant temperature at 30 °C and pH 7.

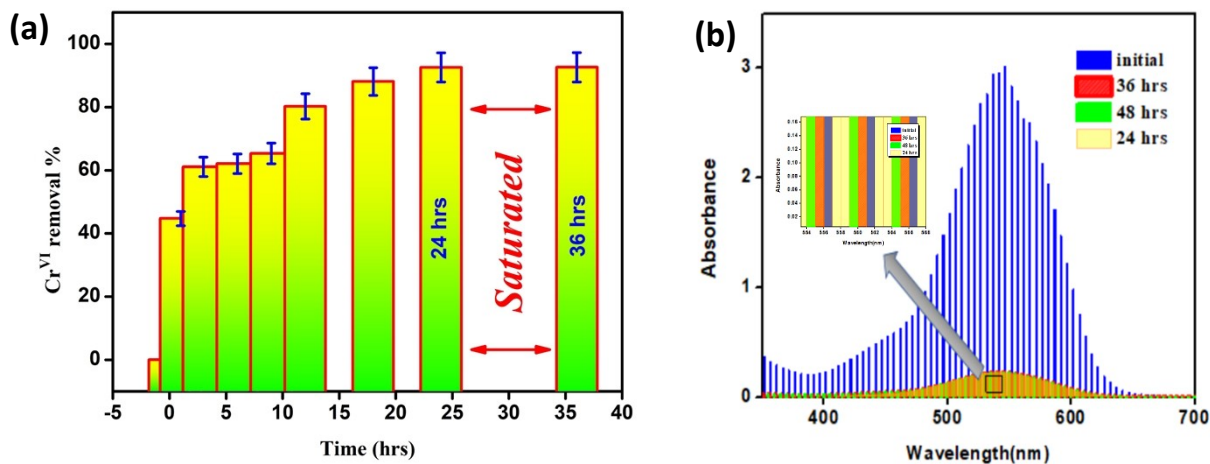

**Figure S9.** (a) Equilibrium study for Cr(VI) reduction upto 36 hrs (with error bars) and (b) Absorbance spectra for Cr(VI) removal at 24, 36 and 48 hrs time interval.

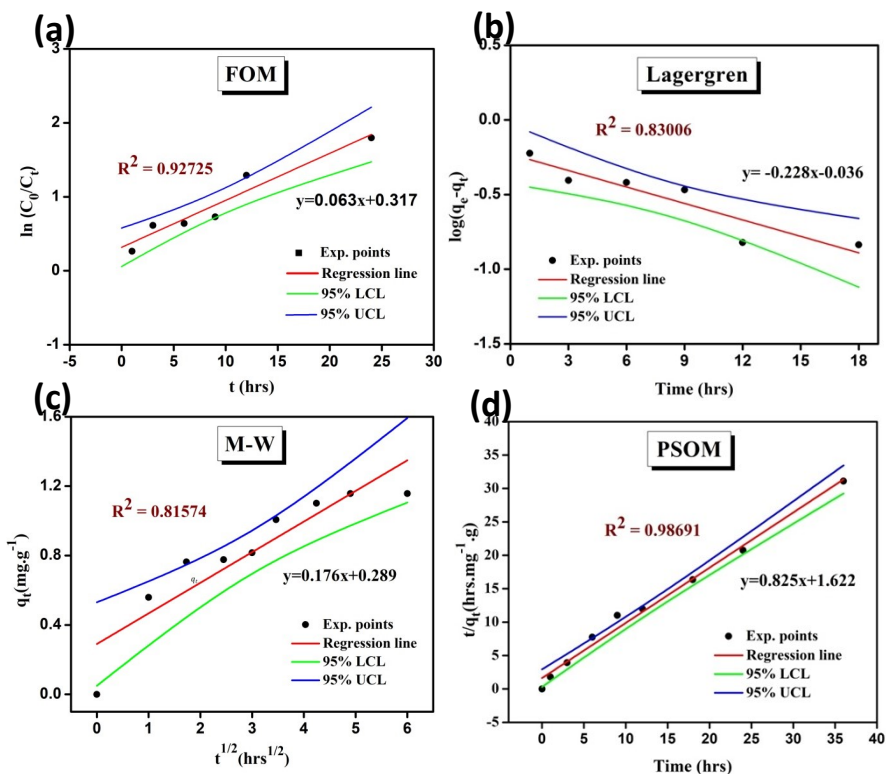

**Figure S10.** (a) 1<sup>st</sup> Order kinetics, (b) Lagergren, (c) Morris-Weber and (d) Pseudo Second Order kinetic models fitted with the experimental data. The time dependent Cr(VI) removal study was done using 400 °C annealed Co<sub>3</sub>O<sub>4</sub> as the catalyst and keeping fixed reaction temperature at 30 °C and pH 7.

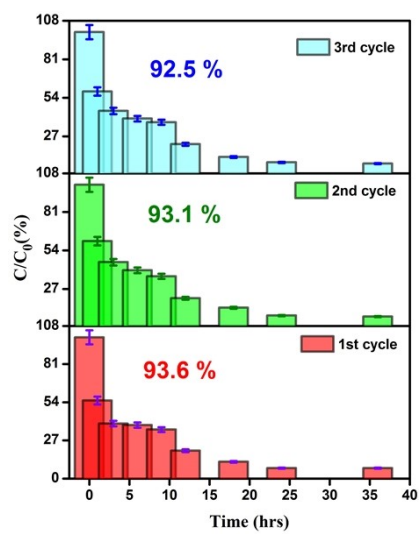

**Figure S11.** Stacked bar diagram comparison (with error bars) between 3 Cr (VI) removal reaction cycles
